# Supplementary material
Source: ML conference proceedings conference paper supplement (https://proceedings.mlr.press/v51/yen16.html)
Supplement: Supplementary file 1 [file yen16-supp.pdf]

## 7 Appendix A: Analysis for Approximate Low-rank Representation

**Theorem 1.** *Suppose the low-rank approximation  $\hat{\mathbb{D}}$  has  $\|\hat{\mathbb{D}} - \mathbb{D}\|_{1,\infty} \leq \epsilon$ , where  $\|A\|_{1,\infty} = \sum_i \max_j |A_{ij}|$ . Then we have*

$$\text{tr}(\mathbb{D}^T \hat{W}) \leq \text{tr}(\mathbb{D}^T W^*) + 2\epsilon, \quad (25)$$

where  $\hat{W}$ ,  $W^*$  are solutions to (2) with dissimilarity matrix  $\hat{\mathbb{D}}$  and  $\mathbb{D}$  respectively.

*Proof.* Since  $\hat{W}$  is the optimal solution of (2) with matrix  $\hat{\mathbb{D}}$ , we have

$$\text{tr}(\hat{\mathbb{D}}^T \hat{W}) \leq \text{tr}(\hat{\mathbb{D}}^T W^*).$$

Therefore,

$$\begin{aligned} \text{tr}(\mathbb{D}^T \hat{W}) - \text{tr}(\mathbb{D}^T W^*) &\leq \\ &\leq \text{tr}(\mathbb{D}^T (\hat{W} - W^*)) \\ &= \text{tr}(\hat{\mathbb{D}}^T (\hat{W} - W^*)) + \text{tr}((\mathbb{D} - \hat{\mathbb{D}})^T (\hat{W} - W^*)) \\ &\leq 0 + \text{tr}((\mathbb{D} - \hat{\mathbb{D}})^T (\hat{W} - W^*)) \\ &\leq \sum_i \left( \max_j |\mathbb{D}_{ij} - \hat{\mathbb{D}}_{ij}| \right) \left( \sum_j |\hat{W}_{ij} - W_{ij}^*| \right) \\ &\leq \left( \sum_i \max_j |\mathbb{D}_{ij} - \hat{\mathbb{D}}_{ij}| \right) \left( \max_i \sum_j |\hat{W}_{ij} - W_{ij}^*| \right) \\ &= \|\mathbb{D} - \hat{\mathbb{D}}\|_{1,\infty} * \|\hat{W}_{ij} - W_{ij}^*\|_{\max,1} \\ &\leq \|\mathbb{D} - \hat{\mathbb{D}}\|_{1,\infty} \left( \|\hat{W}_{ij}\|_{\max,1} + \|W_{ij}^*\|_{\max,1} \right) \leq 2\epsilon. \end{aligned}$$

Note we have used notation  $\|A\|_{\max,1} = \max_i \sum_j |A_{ij}|$  to distinguish from  $\|A\|_{\infty,1} = \sum_j \max_i |A_{ij}|$ .  $\square$

**Theorem 2.** *Suppose the low-rank approximation  $\hat{\mathbb{D}}$  has  $\|\hat{\mathbb{D}} - \mathbb{D}\|_{1,\infty} \leq \epsilon$ , where  $\|A\|_{1,\infty} = \sum_i \max_j |A_{ij}|$ . Then we have*

$$F(\hat{W}) \leq F(W^*) + 2\epsilon, \quad (26)$$

where  $F(\cdot)$  denotes the objective function in (3),  $\hat{W}$ ,  $W^*$  are solutions to (3) with dissimilarity matrix  $\hat{\mathbb{D}}$  and  $\mathbb{D}$  respectively.

*Proof.* Since  $\hat{W}$  is the optimal solution of (2) with matrix  $\hat{\mathbb{D}}$ , we have

$$\text{tr}(\hat{\mathbb{D}}^T \hat{W}) + \lambda \|\hat{W}\|_{\infty,1} \leq \text{tr}(\hat{\mathbb{D}}^T W^*) + \lambda \|W^*\|_{\infty,1},$$

and thus,

$$\begin{aligned} F(\hat{W}) - F(W^*) &\leq \\ &\leq \text{tr}(D^T (\hat{W} - W^*)) + \|\hat{W}\|_{\infty,1} - \|W^*\|_{\infty,1} \\ &= \text{tr}(\hat{\mathbb{D}}^T (\hat{W} - W^*)) + \|\hat{W}\|_{\infty,1} - \|W^*\|_{\infty,1} \\ &\quad + \text{tr}((\mathbb{D} - \hat{\mathbb{D}})^T (\hat{W} - W^*)) \\ &\leq 0 + \text{tr}((\mathbb{D} - \hat{\mathbb{D}})^T (\hat{W} - W^*)) \leq 2\epsilon, \end{aligned}$$

where the final inequality follows from the same reasoning in proof of Theorem 1.  $\square$

## 8 Appendix B: Convergence Analysis of AL-BCD

In this section, we give an analysis that shows global linear convergence of both Algorithm 1 and Algorithm 2. In the first part, we show a linear-type convergence of randomized BCD and Greedy BCD by utilizing the special structure of the AL subproblem. In the second part, we show that by choosing a sufficiently small dual step size  $\eta$ , one can achieve global linear convergence with one step of randomized or Greedy BCD instead of solving each AL subproblem exactly.

### 8.1 Iteration Complexity of Block Coordinate Descent (BCD)

In this section, we give iteration complexity of inner loop in Algorithm 1 and Algorithm 2 when performed on sub-problem (10). Although (10) is not strongly convex, it has strong convexity when restricted to the subspace  $\mathcal{N}^\perp$ , where  $\mathcal{N}$  is the Nullspace of linear equality  $W\mathbf{1} = \mathbf{1}$ . This property can be leveraged to prove exponentially fast convergence [31, 33]. In the following, we prove linear convergence of randomized BCD and Greedy BCD for our AL sub-problem (10).

Notice that the AL sub-problem (10) can be expressed as

$$\begin{aligned} \min_{W, \xi} \quad & \sum_i \sum_{j=1}^M \mathbb{D}_{ij} W_{ij} + \sum_{j=1}^M \lambda_j \xi_j + \frac{\rho}{2} \left\| \sum_{j=1}^M W_j - \mathbf{q} \right\|^2 \\ \text{s.t.} \quad & W_{ij} \leq \xi_j, \quad i \in [N], \\ & W \in [0, 1]^{N \times M}, \quad \xi \in [0, 1]^M. \end{aligned} \quad (27)$$

where  $\mathbf{q} = \mathbf{1} - \alpha^t / \rho$ , and (27) can be further compactly expressed as

$$\min_{\mathbf{x} \in \mathcal{X}} f(\mathbf{x}) = \mathbf{b}^T \mathbf{x} + g(E\mathbf{x}), \quad (28)$$

where  $\mathbf{x} = [\mathbf{x}_1, \mathbf{x}_2, \dots, \mathbf{x}_M]$ ,  $\mathbf{x}_j = (W_j, \xi_j)$ ,  $g(E\mathbf{x}) = \frac{\rho}{2} \left\| \sum_{j=1}^M W_j - \mathbf{q} \right\|^2$  and  $\mathcal{X} = \mathcal{X}_1 \times \mathcal{X}_2 \dots \times \mathcal{X}_M$  is a

polyhedral set with  $\mathcal{X}_j$  defined by the constraints that involves  $j$ -th block of variables  $\mathbf{x}_j = (W_j, \xi_j)$  in (27).

For problem of form (28), [31] shows that the set of optimal solution  $\bar{\mathbf{x}}$  forms a polyhedron satisfying (i)  $E\bar{\mathbf{x}} = \mathbf{t}^*$ , (ii)  $\mathbf{b}^T \bar{\mathbf{x}} = s^*$  and (iii)  $\bar{\mathbf{x}} \in \mathcal{X}$ . Then we can bound the distance of any point  $\bar{\mathbf{x}}$  to the optimal polyhedral set by the amount of infeasibility to the three (in)equalities (i)-(iii) using Hoffman's bound introduced as follows.

**Lemma 1** (Hoffman's Bound). *Let  $\mathcal{S} = \{\mathbf{x} \in \mathbb{R}^d \mid A\mathbf{x} \leq \mathbf{b}, E\mathbf{x} = \mathbf{c}\}$  be a polyhedral set. Then for any point  $\mathbf{x} \in \mathbb{R}^d$ ,*

$$\|\mathbf{x} - \Pi_{\mathcal{S}}(\mathbf{x})\|_2^2 \leq \theta \left\| \begin{bmatrix} A\mathbf{x} - \mathbf{b} \\ E\mathbf{x} - \mathbf{c} \end{bmatrix}_+ \right\|_2^2 \quad (29)$$

where  $\Pi_{\mathcal{S}}(\mathbf{x}) = \arg \min_{\mathbf{y} \in \mathcal{S}} \|\mathbf{y} - \mathbf{x}\|$  is the projection of  $\mathbf{x}$  to the set  $\mathcal{S}$ , and  $\theta > 0$  is a constant depending on the polyhedral set  $\mathcal{S}$ .

*Proof.* The Hoffman's bound first appears in [10] and a proof for the  $\ell_2$ -norm's version (29) and the definition of the constant  $\theta(\mathcal{S})$  can be found in [31] (lemma 4.3).  $\square$

Using Lemma 1, we can bound the distance of any point  $\bar{\mathbf{x}}$  to the optimal polyhedral set formed by the above conditions (i)-(iii) as

$$\|\bar{\mathbf{x}} - \Pi_{\mathcal{S}}(\bar{\mathbf{x}})\|_2^2 \leq \theta(\|E\bar{\mathbf{x}} - \mathbf{t}^*\|^2 + (\mathbf{b}^T \bar{\mathbf{x}} - s^*)^2). \quad (30)$$

Note by norm equivalence, we can also have another version of the error bound (30)

$$\left( \sum_{j=1}^M \|\mathbf{x}_j - \Pi_{\mathcal{S}}(\mathbf{x})_j\|_2 \right)^2 \leq \theta_1(\|E\bar{\mathbf{x}} - \mathbf{t}^*\|^2 + (\mathbf{b}^T \bar{\mathbf{x}} - s^*)^2). \quad (31)$$

for some  $\theta_1$  satisfying  $\theta \leq \theta_1 \leq M\theta$ .

Equipped with those bounds on the minimum distance to an optimal solution, we are ready to show a linear type of convergence for both randomized and greedy BCD algorithms.

Both algorithms work by optimizing a column of variables  $\mathbf{x}_j = (W_j, \xi_j)$  at a time. In particular, since the constraints in (27) are column-separable, equation (17) is derived as the closed-form solution that minimizes (27) w.r.t.  $(W_j, \xi_j)$ . The update can be thus denoted as  $\mathbf{x}^{s+1} - \mathbf{x}^s$ , where  $\mathbf{x}^{s+1}$  has  $W_j^{s+1} = W_j^s + \mathbf{d}_j^*$  as defined in (17),  $\xi_j^{s+1} = \|W_j^{s+1}\|_\infty$ , and all other variables kept the same as  $\mathbf{x}^s$ .

The minimization of (27) w.r.t.  $j$ -th block of coordinates yields the following problem

$$\begin{aligned} \min_{W_j \in [0,1]^N, \xi_j \in [0,1]} \quad & f_j(\mathbf{x}_j) = \mathbb{D}_j^T W_j + \lambda_j \xi_j \\ & + \rho \left( \sum_{k=1}^M W_k - \mathbf{q} \right)^T W_j + \frac{\rho}{2} \|W_j\|^2 \\ \text{s.t.} \quad & W_{ij} \leq \xi_j, \quad i \in [N], \end{aligned} \quad (32)$$

whose objective has Lipschitz-continuous gradient with modulus  $\rho$ . Therefore, denoting  $\Delta \mathbf{x}_j = \mathbf{x}_j^{s+1} - \mathbf{x}_j^s$ , we have

$$\begin{aligned} f_j(\mathbf{x}_j^{s+1}) - f_j(\mathbf{x}_j^s) \\ \leq \min_{\Delta \mathbf{x}_j} h_j(\mathbf{x}_j^s + \Delta \mathbf{x}_j) + \nabla_j f(\mathbf{x}^s)^T \Delta \mathbf{x}_j + \frac{\rho}{2} \|\Delta \mathbf{x}_j\|^2, \end{aligned} \quad (33)$$

where

$$h_j(\mathbf{x}_j) = \begin{cases} 0 & , \mathbf{x}_j \in \mathcal{X}_j, \\ \infty & , \text{o.w.} \end{cases} \quad (34)$$

Then the following Theorem gives linear convergence of Randomized BCD (Algorithm 1) by showing that the RHS of (33) has magnitude as large as a constant multiple of suboptimality  $f(\mathbf{x}^s) - f^*$  in expectation when  $j$  is drawn uniformly from  $[M]$ .

**Theorem 7** (Linear Convergence of Randomized BCD). *The iterate  $\{\mathbf{x}^s\}_{s=1}^\infty$  produced by Algorithm 1 has*

$$\mathbb{E}[f(\mathbf{x}^{s+1})] - f^* \leq \left(1 - \frac{1}{M\gamma}\right) (f(\mathbf{x}^s) - f^*).$$

where  $f^*$  is the optimum of (10) and

$$\gamma = \max \{16\rho\theta(f^0 - f^*), 2\theta(1 + 4L_g^2), 6\}$$

is a constant depending on the initial function difference  $f^0 - f^*$ , local Lipschitz-continuous constant  $L_g$  of the augmented term, and Hoffman constant  $\theta$  of the optimal (polyhedral) solution set.

*Proof.* Let  $\mathbf{x} = \mathbf{x}^s$  be  $s$ -th iterate and  $\mathbf{x}^* = \Pi_{\mathcal{S}}(\mathbf{x})$  be the projection of  $\mathbf{x}^s$  on the optimal solution set, and  $h(\mathbf{x}) = \sum_{j=1}^M h_j(\mathbf{x}_j)$ . Taking expectation w.r.t.  $j$ , the descent amount given by (33) has

$$\begin{aligned} \mathbb{E}[f(\mathbf{x}^{s+1})] - f(\mathbf{x}^s) \\ \leq \frac{1}{M} \left( \min_{\Delta \mathbf{x}} h(\mathbf{x} + \Delta \mathbf{x}) + \nabla f(\mathbf{x})^T \Delta \mathbf{x} + \frac{\rho}{2} \|\Delta \mathbf{x}\|^2 \right) \\ \leq \frac{1}{M} \left( \min_{\Delta \mathbf{x}} h(\mathbf{x} + \Delta \mathbf{x}) + f(\mathbf{x} + \Delta \mathbf{x}) - f(\mathbf{x}) + \frac{\rho}{2} \|\Delta \mathbf{x}\|^2 \right) \\ \leq \frac{1}{M} \left( \min_{\beta \in [0,1]} f(\mathbf{x} + \beta(\mathbf{x}^* - \mathbf{x})) - f(\mathbf{x}) + \frac{\rho\beta^2}{2} \|\mathbf{x}^* - \mathbf{x}\|^2 \right) \\ \leq \frac{1}{M} \left( \min_{\beta \in [0,1]} -\beta(f(\mathbf{x}^*) - f(\mathbf{x})) + \frac{\rho\beta^2}{2} \|\mathbf{x}^* - \mathbf{x}\|^2 \right) \end{aligned} \quad (35)$$

where the second and fourth inequality follow from the convexity of  $f(\mathbf{x})$ , and the third inequality follows from the fact that both  $\mathbf{x}^*$  and  $\mathbf{x}^s$  are feasible ( $h(\mathbf{x}^*) = h(\mathbf{x}) = 0$ ). Let  $L_g \geq 1$  be a Lipschitz-continuous constant of the augmented term  $g(E\mathbf{x})$  for  $\mathbf{x}$  satisfying  $\|E\mathbf{x} - \mathbf{q}\| \leq R_q$  (where  $L_g$  is at least  $\rho R_q$ ). Based on the error bound inequality (30), we discuss two cases.

**Case 1:**  $4L_g^2\|E\mathbf{x} - t^*\|^2 < (\mathbf{b}^T \mathbf{x} - s^*)^2$ .

In this case, we have

$$\begin{aligned} \|\mathbf{x} - \mathbf{x}^*\|^2 &\leq \theta(\|E\mathbf{x} - t^*\|^2 + (\mathbf{b}^T \mathbf{x} - s^*)^2) \\ &\leq \theta\left(\frac{1}{L_g^2} + 1\right)(\mathbf{b}^T \mathbf{x} - s^*)^2 \\ &\leq 2\theta(\mathbf{b}^T \mathbf{x} - s^*)^2, \end{aligned} \quad (36)$$

and

$$|\mathbf{b}^T \mathbf{x} - s^*| \geq 2L_g\|E\mathbf{x} - t^*\| \geq 2|g(E\mathbf{x}) - g(t^*)|$$

by the definition of Lipschitz constant  $L_g$ . Note  $\mathbf{b}^T \mathbf{x} - s^*$  is non-negative since otherwise,  $f(\mathbf{x}) - f^* = g(E\mathbf{x}) - g(t^*) + (\mathbf{b}^T \mathbf{x} - s^*) \leq |g(E\mathbf{x}) - g(t^*)| - |\mathbf{b}^T \mathbf{x} - s^*| \leq -\frac{1}{2}|\mathbf{b}^T \mathbf{x} - s^*| < 0$ , which leads to contradiction. Therefore, we have

$$\begin{aligned} f(\mathbf{x}) - f^* &= g(E\mathbf{x}) - g(t^*) + (\mathbf{b}^T \mathbf{x} - s^*) \\ &\geq -|g(E\mathbf{x}) - g(t^*)| + (\mathbf{b}^T \mathbf{x} - s^*) \\ &\geq \frac{1}{2}(\mathbf{b}^T \mathbf{x} - s^*). \end{aligned} \quad (37)$$

Combining (35), (36) and (37), we have

$$\begin{aligned} \mathbb{E}[f(\mathbf{x}^{s+1})] - f(\mathbf{x}^s) &\leq \frac{1}{M} \min_{\beta \in [0,1]} -\frac{\beta}{2}(\mathbf{b}^T \mathbf{x} - s^*) + \frac{2\rho\theta\beta^2}{2}(\mathbf{b}^T \mathbf{x} - s^*)^2 \\ &= \begin{cases} -1/(16\rho\theta M) & , 1/(4\rho\theta(\mathbf{b}^T \mathbf{x} - s^*)) \leq 1 \\ -\frac{1}{4M}(\mathbf{b}^T \mathbf{x} - s^*) & , o.w. \end{cases} \end{aligned}$$

Furthermore, we have

$$-\frac{1}{16\rho\theta M} \leq -\frac{1}{16\rho\theta M(f^0 - f^*)} (f(\mathbf{x}) - f^*)$$

where  $f^0 = f(\mathbf{x}^0)$ , and

$$-\frac{1}{4M}(\mathbf{b}^T \mathbf{x} - s^*) \leq -\frac{1}{6M}(f(\mathbf{x}) - f^*)$$

since  $f(\mathbf{x}) - f^* \leq |g(E\mathbf{x}) - g(t^*)| + \mathbf{b}^T \mathbf{x} - s^* \leq \frac{3}{2}(\mathbf{b}^T \mathbf{x} - s^*)$ . In summary, for Case 1 we obtain

$$\mathbb{E}[f(\mathbf{x}^{s+1})] - f^* \leq \left(1 - \frac{1}{M\gamma_1}\right) (\mathbb{E}[f(\mathbf{x})] - f^*) \quad (38)$$

where

$$\gamma_1 = \max\{16\rho\theta(f^0 - f^*), 6\}. \quad (39)$$

**Case 2:**  $4L_g^2\|E\mathbf{x} - t^*\|^2 \geq (\mathbf{b}^T \mathbf{x} - s^*)^2$ .

In this case, we have

$$\|\mathbf{x} - \mathbf{x}^*\|^2 \leq \theta(1 + 4L_g^2)\|E\mathbf{x} - t^*\|^2, \quad (40)$$

and by strong convexity of  $g(\cdot)$ ,

$$f(\mathbf{x}) - f^* \geq \mathbf{b}^T(\mathbf{x} - \mathbf{x}^*) + \nabla g(t^*)^T E(\mathbf{x} - \mathbf{x}^*) + \frac{\rho}{2}\|E\mathbf{x} - t^*\|^2.$$

Adding inequality  $0 = h(\mathbf{x}) - h(\mathbf{x}^*) \geq \langle \delta^*, \mathbf{x} - \mathbf{x}^* \rangle$  for some  $\delta^* \in \partial h(\mathbf{x}^*)$  to the above gives

$$f(\mathbf{x}) - f^* \geq \frac{\rho}{2}\|E\mathbf{x} - t^*\|^2 \quad (41)$$

since  $\delta^* + \mathbf{b} + \nabla g(t^*)^T E = \delta^* + \nabla f(\mathbf{x}^*) = 0$ . Combining (35), (40), and (41), we obtain

$$\begin{aligned} \mathbb{E}[f(\mathbf{x}^{s+1})] - f(\mathbf{x}^s) &\leq \frac{1}{M} \left( \min_{\beta \in [0,1]} -\beta(f(\mathbf{x}) - f^*) + \frac{\theta(1 + 4L_g^2)\beta^2}{2} (f(\mathbf{x}) - f^*) \right) \\ &= -\frac{1}{2\theta(1 + 4L_g^2)M} (f(\mathbf{x}) - f^*) \end{aligned} \quad (42)$$

Combining results of Case 1 (38) and Case 2 (42), and taking expectation on both sides w.r.t. the history leads to the result.  $\square$

A similar linear convergence result can be proved for Greedy BCD on the AL subproblem (10) with approximate column generation criteria (20), as shown in the following theorem.

**Theorem 8** (Linear Convergence of Approximate Greedy BCD). *Let  $\{\mathbf{x}^s\}_{s=1}^\infty$  denote iterates produced by Algorithm 2 (without step 2.5) with a fixed  $\alpha$  and let  $f^*$  be the optimum of (10). Then*

$$\mathbb{E}[f(\mathbf{x}^{s+1})] - f^* \leq \left(1 - \frac{1}{m\gamma_2}\right) (f(\mathbf{x}^s) - f^*),$$

where  $m = M/R$ ,

$$\gamma_2 = \max\{16\rho\theta_1(f^0 - f^*), 2\theta_1(1 + 4L_g^2), 6\}.$$

and  $\theta_1$  is the  $\ell_{2,1}$ -norm version of Hoffman constant of the optimal solution set satisfying  $\theta \leq \theta_1 \leq M\theta$ .

*Proof.* Let

$$H_j(\mathbf{x}^s) := \min_{\Delta \mathbf{x}_j} h_j(\mathbf{x}_j^s + \Delta \mathbf{x}_j) + \nabla_j f(\mathbf{x}^s)^T \Delta \mathbf{x}_j + \frac{\rho}{2}\|\Delta \mathbf{x}_j\|^2$$

and

$$j^* = \operatorname{argmin}_j H_j(\mathbf{x}^s).$$

Suppose the Greedy BCD chooses column  $j^*$  to update. We have

$$\begin{aligned}
 f(\mathbf{x}^{s+1}) - f(\mathbf{x}^s) &\leq H_{j^*}(\mathbf{x}^s) \\
 &= \min_{\Delta \mathbf{x}: \mathbf{x} + \Delta \mathbf{x} \in \mathcal{X}} \nabla f(\mathbf{x})^T \Delta \mathbf{x} + \frac{\rho}{2} \left( \sum_{j=1}^M \|\Delta \mathbf{x}_j\|_2 \right)^2 \\
 &\leq \min_{\Delta \mathbf{x}: \mathbf{x} + \Delta \mathbf{x} \in \mathcal{X}} f(\mathbf{x} + \Delta \mathbf{x}) - f(\mathbf{x}) + \frac{\rho}{2} \left( \sum_{j=1}^M \|\Delta \mathbf{x}_j\|_2 \right)^2 \\
 &\leq \min_{\beta \in [0,1]} f(\mathbf{x} + \beta \Delta \mathbf{x}^*) - f(\mathbf{x}) + \frac{\rho \beta^2}{2} \left( \sum_{j=1}^M \|\Delta \mathbf{x}_j^*\|_2 \right)^2 \\
 &\leq \min_{\beta \in [0,1]} -\beta(f(\mathbf{x}^*) - f(\mathbf{x})) + \frac{\rho \beta^2}{2} \left( \sum_{j=1}^M \|\Delta \mathbf{x}_j^*\|_2 \right)^2
 \end{aligned}$$

where  $\Delta \mathbf{x}^* = \mathbf{x}^* - \mathbf{x}$ . The first equality is from the fact that linear objective subject to  $\ell_{2,1}$ -norm constraint has solution on the corner point, which corresponds to  $\Delta \mathbf{x}$  with  $\Delta \mathbf{x}_j = 0, \forall j \neq j^*$ .

Now consider the approximate greedy column generation based on (20). Note that the approximate score given by (20) is always an underestimate of the true score, and if a column  $j$  is picked for generating reference vector  $\mathbf{q}_j$  the computed score for column  $j$  is always exact, and therefore the approximate column generation returns a column that is at least as good as the best one used as reference vectors. By drawing  $R$  reference vectors, there is  $R/M$  probability column  $j^*$  is picked. As a result, the iterates produced by approximate column generation have

$$\begin{aligned}
 f(\mathbf{x}^{s+1}) - f(\mathbf{x}^s) &\leq \frac{1}{m} H_{j^*}(\mathbf{x}^s) \\
 &\leq \frac{1}{m} \left( \min_{\beta \in [0,1]} -\beta(f(\mathbf{x}^*) - f(\mathbf{x})) + \frac{\rho \beta^2}{2} \left( \sum_{j=1}^M \|\Delta \mathbf{x}_j^*\|_2 \right)^2 \right)
 \end{aligned}$$

where  $m = M/R$ . Then following the same reasoning as in Theorem 7 with (30) replaced by the  $\ell_{2,1}$ -norm version of the Hoffman bound (31) gives the result.  $\square$

## 8.2 Iteration Complexity of AL-BCD

In this section, we show global linear convergence of both randomized AL-BCD (Algorithm 1) and AL-BCD with column generation (Algorithm 2).

Recall that  $\mathcal{L}(W; \boldsymbol{\alpha})$  is the Augmented Lagrangian function. The dual objective of the exemplar clustering problem is

$$d(\boldsymbol{\alpha}) := \min_{W \geq 0} \mathcal{L}(W, \boldsymbol{\alpha})$$

and

$$d^* := \max_{\boldsymbol{\alpha}} d(\boldsymbol{\alpha})$$

is the optimal dual objective.

Then we measure the sub-optimality of iterates  $\{(W^t, \boldsymbol{\alpha}^t)\}_{t=1}^T$  given by our algorithms in terms of the dual function difference

$$\Delta_d^t = d^* - d(\boldsymbol{\alpha}^t)$$

and the primal function difference:

$$\Delta_p^t = \mathcal{L}(W^{t+1}, \boldsymbol{\alpha}^t) - d(\boldsymbol{\alpha}^t).$$

It is clear that any  $(W^{t+1}, \boldsymbol{\alpha}^t)$  satisfying  $\Delta_d^t = \Delta_p^t = 0$  is an optimal solution to our original problem (3).

**Lemma 2** (Dual Progress). *Each dual update (11) leads to*

$$\Delta_d^t - \Delta_d^{t-1} \leq -\eta(W^t \mathbf{1}_M - \mathbf{1}_N)^T (\bar{W}^t \mathbf{1}_M - \mathbf{1}_N), \quad (43)$$

where  $\bar{W}^t$  is the projection of  $W^t$  to the optimal solution set of AL function

$$\operatorname{argmin}_W \mathcal{L}(W, \boldsymbol{\alpha}^t).$$

*Proof.*

$$\begin{aligned}
 \Delta_d^t - \Delta_d^{t-1} &= d^* - d(\boldsymbol{\alpha}^t) - d^* - d(\boldsymbol{\alpha}^{t-1}) \\
 &= \mathcal{L}(\bar{W}^{t-1}, \boldsymbol{\alpha}^{t-1}) - \mathcal{L}(\bar{W}^t, \boldsymbol{\alpha}^t) \\
 &\leq \mathcal{L}(\bar{W}^t, \boldsymbol{\alpha}^{t-1}) - \mathcal{L}(\bar{W}^t, \boldsymbol{\alpha}^t) \\
 &= \langle \boldsymbol{\alpha}^{t-1} - \boldsymbol{\alpha}^t, \bar{W}^t \mathbf{1}_M - \mathbf{1}_N \rangle \\
 &= -\eta \langle W^t \mathbf{1}_M - \mathbf{1}_N, \bar{W}^t \mathbf{1}_M - \mathbf{1}_N \rangle
 \end{aligned}$$

where the first inequality follows from the optimality of  $\bar{W}^{t-1}$  for the function  $\mathcal{L}(W, \boldsymbol{\alpha}^{t-1})$ , and the last equality follows from the dual update (11).  $\square$

the following lemma gives an expression on the primal progress that is independent of the algorithm used for minimizing Augmented Lagrangian

**Lemma 3** (Primal Progress). *Each iteration of Algorithm 1 and Algorithm 2 satisfies*

$$\begin{aligned}
 \Delta_p^t - \Delta_p^{t-1} &\leq \mathcal{L}(W^{t+1}, \boldsymbol{\alpha}^t) - \mathcal{L}(W^t, \boldsymbol{\alpha}^t) \\
 &\quad + \eta \|W^t \mathbf{1}_M - \mathbf{1}_N\|^2 \\
 &\quad - \eta \langle W^t \mathbf{1}_M - \mathbf{1}_N, \bar{W}^t \mathbf{1}_M - \mathbf{1}_N \rangle
 \end{aligned}$$

*Proof.*

$$\begin{aligned}
 \Delta_p^t - \Delta_p^{t-1} &= \mathcal{L}(W^{t+1}, \boldsymbol{\alpha}^t) - \mathcal{L}(W^t, \boldsymbol{\alpha}^{t-1}) - (d(\boldsymbol{\alpha}^t) - d(\boldsymbol{\alpha}^{t-1})) \\
 &\leq \mathcal{L}(W^{t+1}, \boldsymbol{\alpha}^t) - \mathcal{L}(W^t, \boldsymbol{\alpha}^t) + \mathcal{L}(W^t, \boldsymbol{\alpha}^t) - \mathcal{L}(W^t, \boldsymbol{\alpha}^{t-1}) \\
 &\quad + (d(\boldsymbol{\alpha}^{t-1}) - d(\boldsymbol{\alpha}^t)) \\
 &\leq \mathcal{L}(W^{t+1}, \boldsymbol{\alpha}^t) - \mathcal{L}(W^t, \boldsymbol{\alpha}^t) + \eta \|W^t \mathbf{1}_M - \mathbf{1}_N\|^2 \\
 &\quad - \eta \langle W^t \mathbf{1}_M - \mathbf{1}_N, \bar{W}^t \mathbf{1}_M - \mathbf{1}_N \rangle
 \end{aligned}$$

where the last inequality uses Lemma 2 on  $d(\boldsymbol{\alpha}^{t-1}) - d(\boldsymbol{\alpha}^t) = \Delta_d^t - \Delta_d^{t-1}$ .  $\square$

By combining results of Lemma 2 and 3, we can obtain a joint progress of the form

$$\begin{aligned} & \Delta_d^t - \Delta_d^{t-1} + \Delta_p^t - \Delta_p^{t-1} \\ & \leq \mathcal{L}(W^{t+1}, \boldsymbol{\alpha}^t) - \mathcal{L}(W^t, \boldsymbol{\alpha}^t) + \eta \|W^t \mathbf{1}_M - \bar{W}^t \mathbf{1}_M\|^2 \\ & \quad - \eta \|\bar{W}^t \mathbf{1}_M - \mathbf{1}_N\|^2 \end{aligned} \quad (44)$$

Note the only positive term in (44) is the term  $\eta \|W^t \mathbf{1}_M - \bar{W}^t \mathbf{1}_M\|^2$ . To guarantee descent of the joint measure of suboptimality  $\Delta_d^t + \Delta_p^t$ , we bound the second term of (44) with the primal gap  $\mathcal{L}(W^t, \boldsymbol{\alpha}^t) - d(\boldsymbol{\alpha}^t)$  given by the following lemma.

**Lemma 4.**

$$\|W^t \mathbf{1}_M - \bar{W}^t \mathbf{1}_M\|^2 \leq \frac{2}{\rho} (\mathcal{L}(W^t, \boldsymbol{\alpha}^t) - \mathcal{L}(\bar{W}^t, \boldsymbol{\alpha}^t)) \quad (45)$$

*Proof.* Let

$$\tilde{\mathcal{L}}(W, \boldsymbol{\alpha}) = h(W) + g(W \mathbf{1}_M),$$

where

$$g(W \mathbf{1}_M) = \frac{\rho}{2} \|W \mathbf{1}_M - \mathbf{1}_N\|^2$$

and

$$h(W) = \text{tr}(\mathbb{D}^T W) + \lambda \|W\|_{\infty,1} + \boldsymbol{\alpha}^T (W \mathbf{1}_M - \mathbf{1}_N),$$

, if  $W \geq 0$  and  $h(W) = \infty$  if  $W$  is infeasible. According to the definition of  $d(\boldsymbol{\alpha})$ , we know that

$$0 \in \partial_W \tilde{\mathcal{L}}(\bar{W}^t, \boldsymbol{\alpha}) = \partial h(\bar{W}^t) + \nabla_W g(W \mathbf{1}_M).$$

By the convexity of  $h(\cdot)$  and the strong convexity of  $g(\cdot)$ , we have

$$h(W^t) - h(\bar{W}^t) \geq \langle \delta^*, W^t - \bar{W}^t \rangle$$

for any  $\delta^* \in \partial h(\bar{W}^t)$ . and

$$\begin{aligned} & g(W^t \mathbf{1}_M) - g(\bar{W}^t \mathbf{1}_M) \\ & \geq \langle \nabla_W g(W^t \mathbf{1}_M), W^t - \bar{W}^t \rangle + \frac{\rho}{2} \|W^t \mathbf{1}_M - \bar{W}^t \mathbf{1}_M\|^2 \end{aligned}$$

The the above two together implies

$$\mathcal{L}(W^t, \boldsymbol{\alpha}^t) - \mathcal{L}(\bar{W}^t, \boldsymbol{\alpha}^t) \geq \frac{\rho}{2} \|W^t \mathbf{1}_M - \bar{W}^t \mathbf{1}_M\|^2$$

which leads to our conclusion.  $\square$

Now the joint progress can be written as

$$\begin{aligned} & \Delta_d^t - \Delta_d^{t-1} + \Delta_p^t - \Delta_p^{t-1} \\ & \leq \mathcal{L}(W^{t+1}, \boldsymbol{\alpha}^t) - \mathcal{L}(W^t, \boldsymbol{\alpha}^t) \\ & \quad + \frac{2\eta}{\rho} (\mathcal{L}(W^t, \boldsymbol{\alpha}^t) - \mathcal{L}(\bar{W}^t, \boldsymbol{\alpha}^t)) \\ & \quad - \eta \|\bar{W}^t \mathbf{1}_M - \mathbf{1}_N\|^2, \end{aligned} \quad (46)$$

which indicates that as long as the primal update leads to a descent of AL function  $\mathcal{L}(W^{t+1}, \boldsymbol{\alpha}^t) - \mathcal{L}(W^t, \boldsymbol{\alpha}^t)$  proportional to the current primal suboptimality  $\mathcal{L}(W^t, \boldsymbol{\alpha}^t) - \mathcal{L}(\bar{W}^t, \boldsymbol{\alpha}^t)$ , one can choose a small enough constant step size  $\eta$  to guarantee descent of the joint suboptimality  $\Delta_d^t + \Delta_p^t$ .

Note the term  $\bar{W}^t \mathbf{1}_M - \mathbf{1}_N$  is actually gradient of dual objective  $\nabla d(\boldsymbol{\alpha}^t)$ , and since problem (3) satisfies the Assumption A(a)-A(e) in [11], the error bound

$$\Delta_d(\boldsymbol{\alpha}) \leq \tau \|\nabla d(\boldsymbol{\alpha})\|^2 \quad (47)$$

in Lemma 3.1 of [11] applies to our dual objective  $d(\boldsymbol{\alpha})$  with compact domain  $\boldsymbol{\alpha} \in R(\boldsymbol{\alpha}^0)$ , where  $\tau > 0$  is a constant that depends on geometry of solution set  $S$ .

Now we are ready to give the convergence results for Randomized ALBCD and Greedy ALBCD.

**Theorem 9** (Linear Convergence of Randomized ALBCD). *The iterates  $\{(W^t, \boldsymbol{\alpha}^t)\}_{t=1}^{\infty}$  produced by Algorithm 1 has*

$$\Delta_d^t + \Delta_p^t \leq \frac{1}{1 + \min(\frac{1}{2M\gamma}, \frac{\eta}{\tau})} (\Delta_d^{t-1} + \Delta_p^{t-1}),$$

for any  $0 < \eta \leq \rho/4M\gamma$ , where  $\tau > 0$  is a constant depending on the geometry of optimal solution set.

*Proof.* By (46), (47) and Theorem 7, we have

$$\begin{aligned} & \Delta_d^t - \Delta_d^{t-1} + \Delta_p^t - \Delta_p^{t-1} \\ & \leq -\frac{1}{M\gamma} (\mathcal{L}(W^t, \boldsymbol{\alpha}^t) - \mathcal{L}(\bar{W}^t, \boldsymbol{\alpha}^t)) \\ & \quad + \frac{2\eta}{\rho} (\mathcal{L}(W^t, \boldsymbol{\alpha}^t) - \mathcal{L}(\bar{W}^t, \boldsymbol{\alpha}^t)) \\ & \quad - \frac{\eta}{\tau} \Delta_d^t. \end{aligned}$$

Setting  $\eta \leq \rho/4M\gamma$ , we have

$$\begin{aligned} & \Delta_d^t - \Delta_d^{t-1} + \Delta_p^t - \Delta_p^{t-1} \\ & \leq -\frac{1}{2M\gamma} (\mathcal{L}(W^t, \boldsymbol{\alpha}^t) - \mathcal{L}(\bar{W}^t, \boldsymbol{\alpha}^t)) - \frac{\eta}{\tau} \Delta_d^t \\ & \leq -\frac{1}{2M\gamma} \Delta_p^t - \frac{\eta}{\tau} \Delta_d^t, \end{aligned}$$

which leads to the result.  $\square$

**Theorem 10** (Linear Convergence of Greedy ALBCD). *The iterates  $\{(W^t, \boldsymbol{\alpha}^t)\}_{t=1}^{\infty}$  produced by Algorithm 2 has*

$$\Delta_d^t + \Delta_p^t \leq \frac{1}{1 + \min(\frac{1}{2m\gamma_2}, \frac{\eta}{\tau})} (\Delta_d^{t-1} + \Delta_p^{t-1}),$$

for any  $0 < \eta \leq \rho/4m\gamma_2$ .

*Proof.* By (46), (47) and Theorem 8, we have

$$\begin{aligned}
 & \Delta_d^t - \Delta_d^{t-1} + \Delta_p^t - \Delta_p^{t-1} \\
 & \leq -\frac{1}{m\gamma_2}(\mathcal{L}(W^t, \boldsymbol{\alpha}^t) - \mathcal{L}(\bar{W}^t, \boldsymbol{\alpha}^t)) \\
 & \quad + \frac{2\eta}{\rho}(\mathcal{L}(W^t, \boldsymbol{\alpha}^t) - \mathcal{L}(\bar{W}^t, \boldsymbol{\alpha}^t)) \\
 & \quad - \frac{\eta}{\tau}\Delta_d^t.
 \end{aligned}$$

Setting  $\eta \leq \rho/4m\gamma_2$ , we have

$$\begin{aligned}
 & \Delta_d^t - \Delta_d^{t-1} + \Delta_p^t - \Delta_p^{t-1} \\
 & \leq -\frac{1}{2m\gamma_2}(\mathcal{L}(W^t, \boldsymbol{\alpha}^t) - \mathcal{L}(\bar{W}^t, \boldsymbol{\alpha}^t)) - \frac{\eta}{\tau}\Delta_d^t \\
 & \leq -\frac{1}{2m\gamma_2}\Delta_p^t - \frac{\eta}{\tau}\Delta_d^t,
 \end{aligned}$$

which leads to the result.  $\square$
